# Supplementary material
Source: PubMed Central journal article supplement (PMC1832008)
Supplement: bmj_39106.476215.BE_1.pdf [file bmj_39106.476215.BE_1.pdf]

- w1. Reeves BC, Angelini GD, Bryan AJ, Taylor FC, Cripps T, Spyt TJ, et al. A multi-centre randomised controlled trial of minimally invasive direct coronary bypass grafting versus percutaneous transluminal coronary angioplasty with stenting for proximal stenosis of the left anterior descending coronary artery. *Health Technol Assess* 2004;8:1-43.
- w2. Drenth DJ, Veeger NJ, Winter JB, Grandjean JG, Mariani MA, van Boven AJ, et al. A prospective randomized trial comparing stenting with off-pump coronary surgery for high-grade stenosis in the proximal left anterior descending coronary artery: three-year follow-up. *J Am Coll Cardiol* 2002;40:1955-60.
- w3. Drenth DJ, Winter JB, Veeger NJ, Monnick SH, van Boven AJ, Grandjean JG, et al. Minimally invasive coronary artery bypass grafting versus percutaneous transluminal coronary angioplasty with stenting in isolated high-grade stenosis of the proximal left anterior descending coronary artery: six months' angiographic and clinical follow-up of a prospective randomized study. *J Thorac Cardiovasc Surg* 2002;124:130-5.
- w4. Drenth DJ, Veeger NJ, Grandjean JG, Mariani MA, van Boven AJ, Boonstra PW. Isolated high-grade lesion of the proximal LAD: a stent or off-pump LIMA? *Eur J Cardiothorac Surg* 2004;25:567-71.
- w5. Cisowski M, Drzewiecka-Gerber A, Ulczok R, Abu Samra R, Drzewiecki J, Guzy M, et al. Primary direct stenting versus endoscopic atraumatic coronary artery bypass surgery in patients with proximal stenosis of the left anterior descending coronary artery—a prospective, randomised study. *Kardiol Pol* 2004;61:253-61; discussion 262-4.
- w6. Cisowski M, Drzewiecki J, Drzewiecka-Gerber A, Jaklik A, Kruczak W, Szczeklik M, et al. Primary stenting versus MIDCAB: preliminary report—comparison of two methods of revascularization in single left anterior descending coronary artery stenosis. *Ann Thorac Surg* 2002;74:S1334-9.
- w7. Cisowski M, Morawski W, Drzewiecki J, Kruczak W, Toczek K, Bis J, et al. Integrated minimally invasive direct coronary artery bypass grafting and angioplasty for coronary artery revascularization. *Eur J Cardiothorac Surg* 2002;22:261-5.
- w8. O'Keefe JH Jr, Kreamer TR, Jones PG, Vacek JL, Gorton ME, Muehlebach GF, et al. Isolated left anterior descending coronary artery disease: percutaneous transluminal coronary angioplasty versus stenting versus left internal mammary artery bypass grafting. *Circulation* 1999;100(Suppl 19):II114-8.
- w9. Shirai K, Lansky AJ, Mehran R, Dangas GD, Costantini CO, Fahy M, et al. Minimally invasive coronary artery bypass grafting versus stenting for patients with proximal left anterior descending coronary artery disease. *Am J Cardiol* 2004;93:959-62.
- w10. Villareal RP, Lee VV, Elayda MA, Wilson JM. Coronary artery bypass surgery versus coronary stenting: risk-adjusted survival rates in 5,619 patients. *Tex Heart Inst J* 2002;29:3-9.
- w11. Iakovou I, Dangas G, Mehran R, Lansky AJ, Stamou SC, Pfister AJ, et al. Minimally invasive direct coronary artery bypass (MIDCAB) versus coronary artery stenting for elective revascularization of the left anterior descending artery. *Am J Cardiol* 2002;90:885-7.

- w12. Goy JJ, Kaufmann U, Goy-Eggenberger D, Garachemani A, Hurni M, Carrel T, et al. A prospective randomized trial comparing stenting to internal mammary artery grafting for proximal, isolated de novo left anterior coronary artery stenosis: the SIMA trial. Stenting vs Internal Mammary Artery. *Mayo Clin Proc* 2000;75(11):1116-23.
- w13. Diegeler A, Thiele H, Falk V, Hambrecht R, Spyranis N, Sick P, et al. Comparison of stenting with minimally invasive bypass surgery for stenosis of the left anterior descending coronary artery. *N Engl J Med* 2002;347(8):561-6.
- w14. Hong SJ, Lim DS, Seo HS, Kim YH, Shim WJ, Park CG, et al. Percutaneous coronary intervention with drug-eluting stent implantation vs. minimally invasive direct coronary artery bypass (MIDCAB) in patients with left anterior descending coronary artery stenosis. *Catheter Cardiovasc Interv* 2005;64(1):75-81.
- w15. Kim JW, Lim do S, Sun K, Shim WJ, Rho YM. Stenting or MIDCAB using ministernotomy for revascularization of proximal left anterior descending artery? *Int J Cardiol* 2005;99(3):437-41.
